# Supplementary figures and images for: Microwave accelerated synthesis and evaluation of conjugated oligomers based on 2,5-di-thiophene-[1,3,4]thiadiazole
Source: Royal Society of Chemistry journal article supplement (doi:10.1039/b922714h), 2010-01-01

## POM of Compound 7

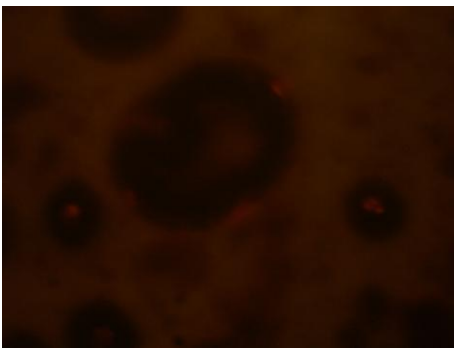

I Phase @ 340°C

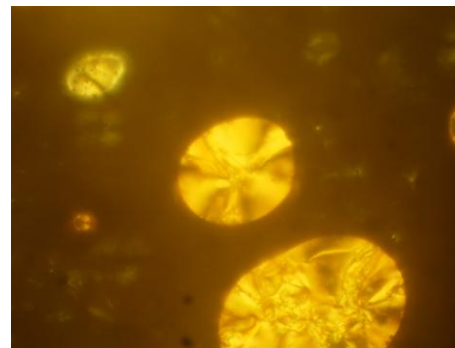

N Phase @ 307°C

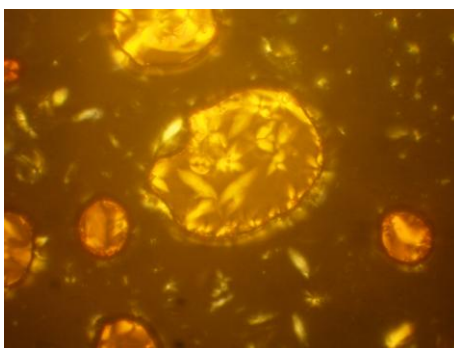

SmA Batonnets growth @ 298°C

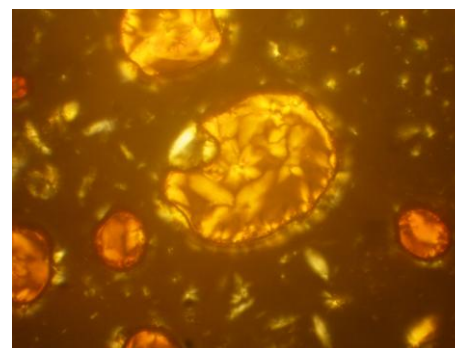

SmA Phase @ 294°C

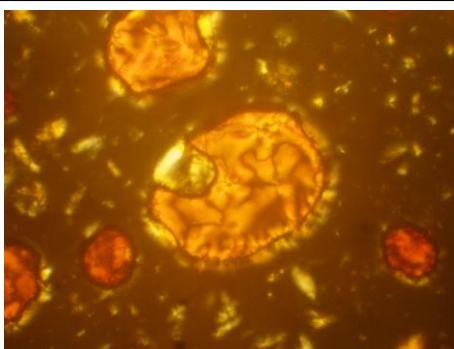

SmX Phase @ 268°C

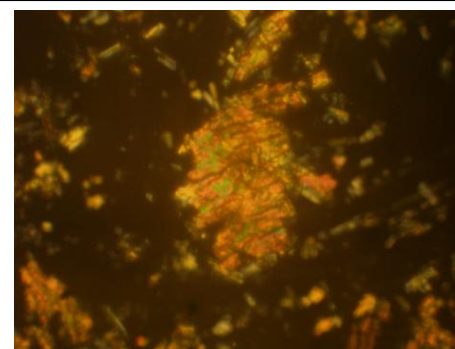

Cr Phase @ 25°C

Supplement: b922714h-1.pdf [file b922714h-1.pdf]
